# Supplementary material
Source: PubMed Central journal article supplement (PMC8111160)
Supplement: JCM.01699-20-s0001.pdf [file JCM.01699-20-s0001.pdf]

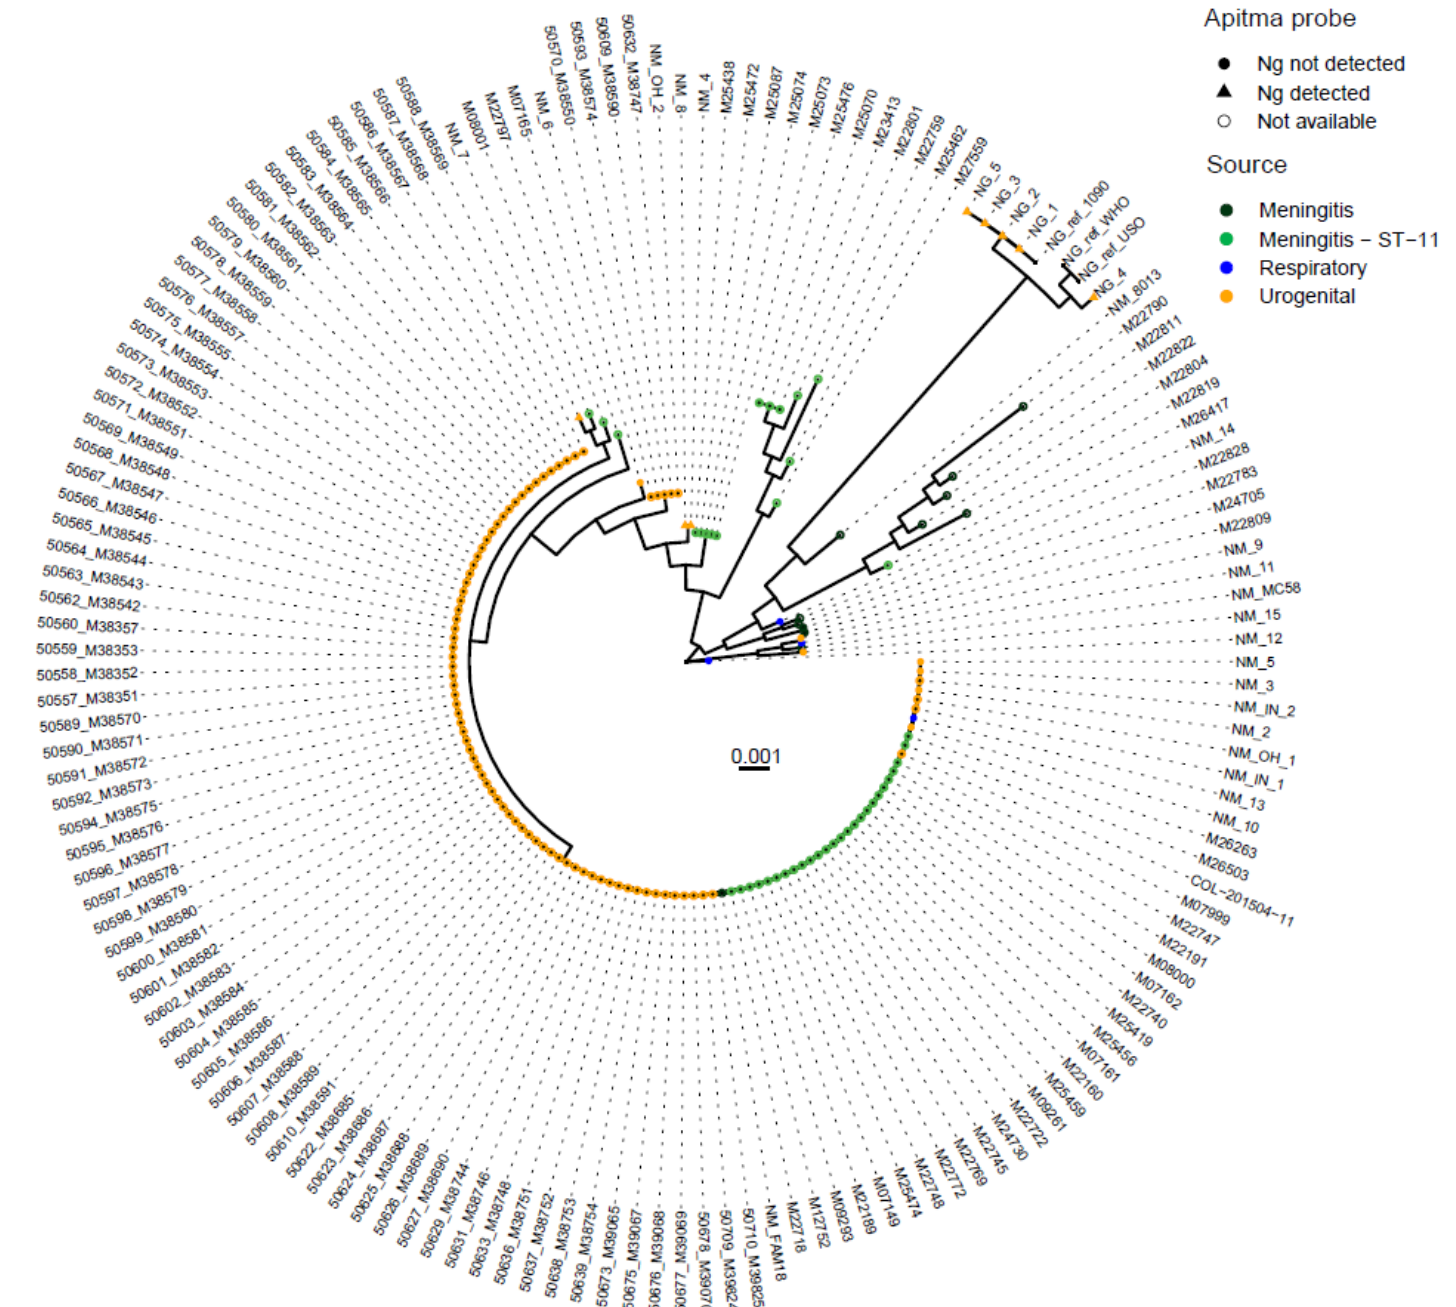

**Figure S1.**

**Nm urogenital 16S rRNA gene sequences do not form a clade with Ng 16S rRNA gene sequences in an approximate maximum likelihood tree of core genome alignment.** 16S rRNA gene sequences of Nm urinary and respiratory isolates collected in St. Louis were compared to reference Nm isolates from meningitis clonal complex ST-11 and urethritis-associated isolates collected in Ohio and Indiana. Source is indicated by color of tip where yellow = urogenital isolates, light green = ST-11 meningitis isolates, dark green = meningitis isolates, and blue = respiratory isolates. Nm urogenital isolates primarily fall into a single clade with other ST-11 isolates. All Ng isolates form a separate monophyletic clade.

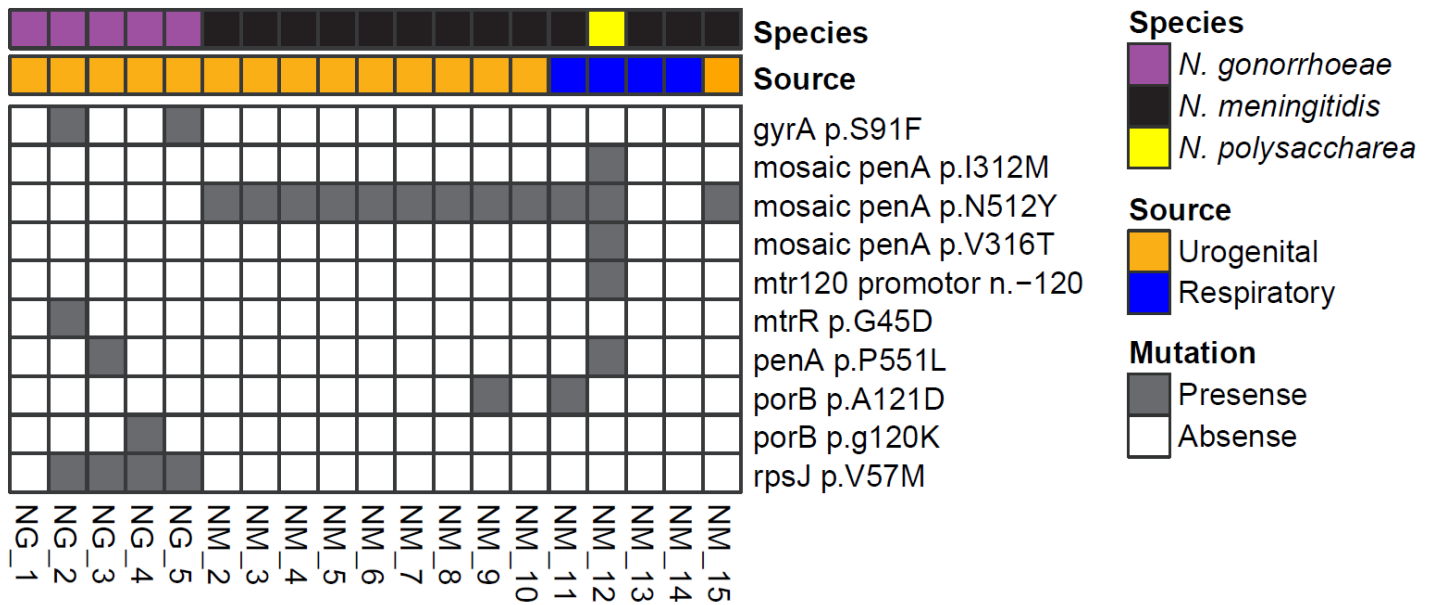

**Figure S2**

**Point mutations among select antibiotic resistance genes vary between *Neisseria* species.** 11 of 14 Nm isolates, including all Nm urogenital isolates have a point mutation in penA p.N512Y, which is not present in any Ng isolate. 4 of 5 Ng isolates have a point mutation in rpsJ p.V57M, which is not present in any Nm isolate. Color strips indicate source of isolate and species identification.

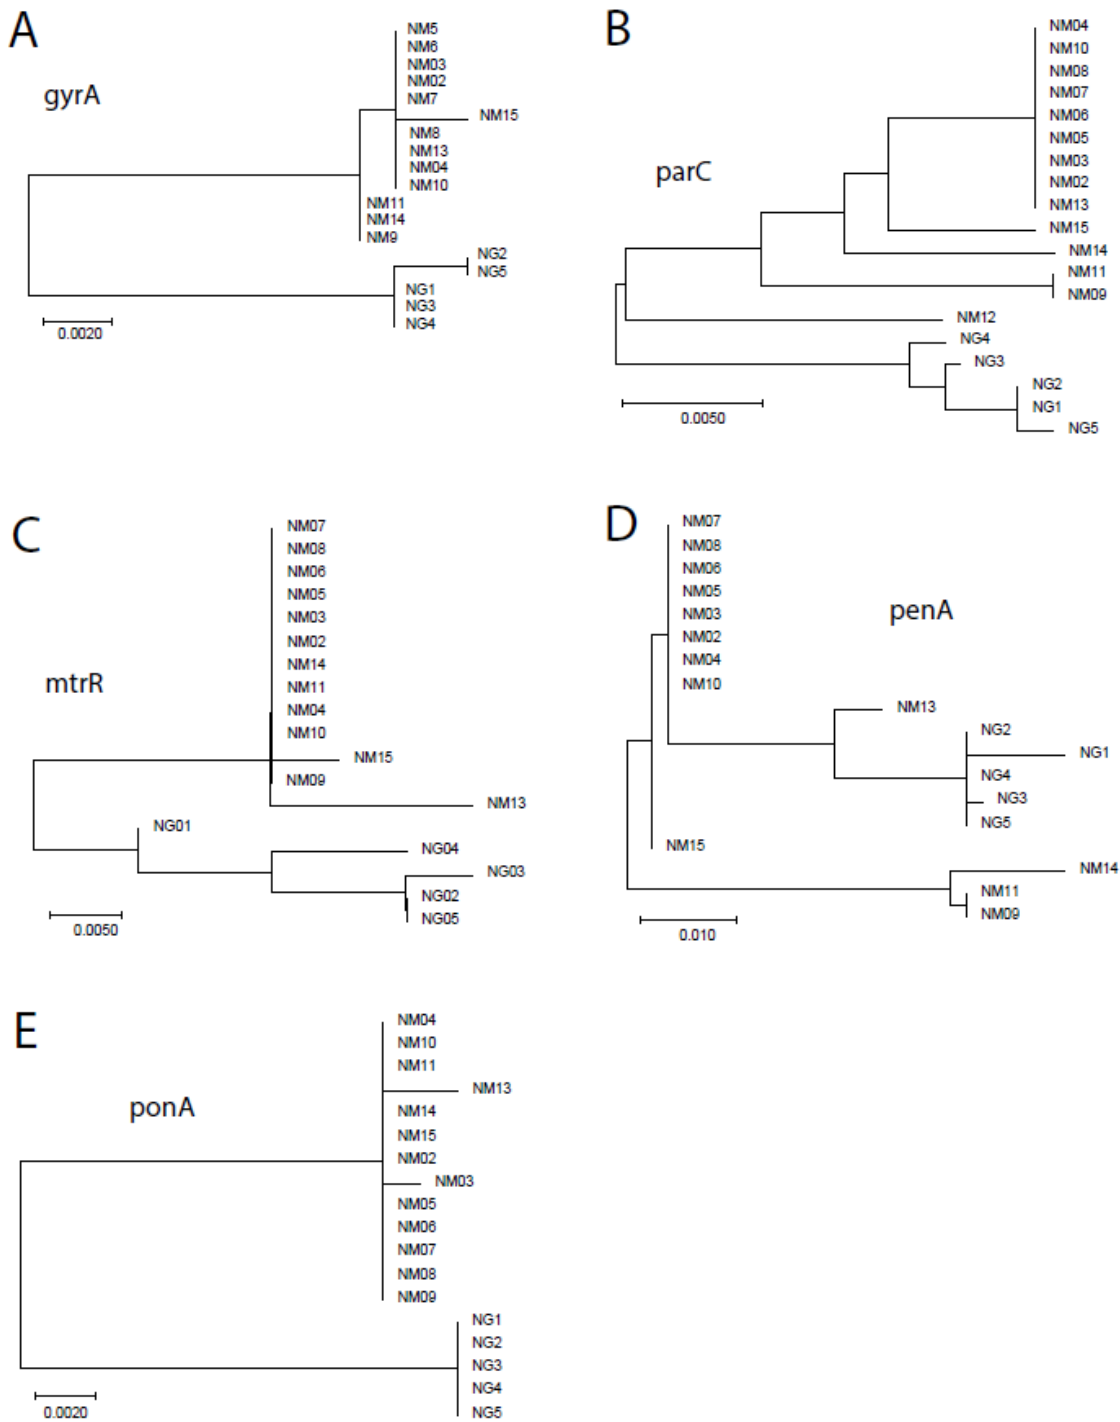

**Figure S3**

**Maximum likelihood trees of resistance genes in Nm and Ng isolates.** Resistance genes were chosen as mutations in these genes are commonly associated with resistance to ciprofloxacin (*gyrA* and *parC*), azithromycin (*mtrR*), extended-spectrum cephalosporins (*penA*), and penicillin (*penA*, *ponA*, *mtrR*).

**Table S1. STL-collected and reference isolate source information.**

| Sample Name   | Accession    | Location     | Source     | Species                | MLST Clonal Complex |
|---------------|--------------|--------------|------------|------------------------|---------------------|
| 50557_M38351  | SRS1896350   | OH, USA      | Urogenital | <i>N. meningitidis</i> | 11                  |
| 50558_M38352  | SRS1896346   | OH, USA      | Urogenital | <i>N. meningitidis</i> | 11                  |
| 50599_M38580  | SRS1896357   | OH, USA      | Urogenital | <i>N. meningitidis</i> | 11                  |
| 50622_M38685  | SRS1896310   | OH, USA      | Urogenital | <i>N. meningitidis</i> | 11                  |
| 50623_M38686  | SRS1896364   | OH, USA      | Urogenital | <i>N. meningitidis</i> | 11                  |
| 50624_M38687  | SRS1896303   | OH, USA      | Urogenital | <i>N. meningitidis</i> | 11                  |
| 50625_M38688  | SRS1896365   | OH, USA      | Urogenital | <i>N. meningitidis</i> | 11                  |
| 50626_M38689  | SRS1896323   | OH, USA      | Urogenital | <i>N. meningitidis</i> | 11                  |
| 50627_M38690  | SRS1896344   | OH, USA      | Urogenital | <i>N. meningitidis</i> | 11                  |
| 50629_M38744  | SRS1896361   | OH, USA      | Urogenital | <i>N. meningitidis</i> | 11                  |
| 50631_M38746  | SRS1896340   | OH, USA      | Urogenital | <i>N. meningitidis</i> | 11                  |
| 50632_M38747  | SRS1896306   | OH, USA      | Urogenital | <i>N. meningitidis</i> | 11                  |
| 50633_M38748  | SRS1896373   | OH, USA      | Urogenital | <i>N. meningitidis</i> | 11                  |
| 50636_M38751  | SRS1896305   | OH, USA      | Urogenital | <i>N. meningitidis</i> | 11                  |
| 50637_M38752  | SRS1896301   | OH, USA      | Urogenital | <i>N. meningitidis</i> | 11                  |
| 50638_M38753  | SRS1896334   | OH, USA      | Urogenital | <i>N. meningitidis</i> | 11                  |
| 50639_M38754  | SRS1896367   | OH, USA      | Urogenital | <i>N. meningitidis</i> | 11                  |
| 50673_M39065  | SRS1896311   | OH, USA      | Urogenital | <i>N. meningitidis</i> | 11                  |
| 50675_M39067  | SRS1896363   | OH, USA      | Urogenital | <i>N. meningitidis</i> | 11                  |
| 50676_M39068  | SRS1896327   | OH, USA      | Urogenital | <i>N. meningitidis</i> | 11                  |
| 50677_M39069  | SRS1896341   | OH, USA      | Urogenital | <i>N. meningitidis</i> | 11                  |
| 50678_M39070  | SRS1896372   | OH, USA      | Urogenital | <i>N. meningitidis</i> | 11                  |
| 50709_M39824  | SRS1896322   | OH, USA      | Urogenital | <i>N. meningitidis</i> | 11                  |
| 50710_M39825  | SRS1896354   | OH, USA      | Urogenital | <i>N. meningitidis</i> | 11                  |
| COL-201504-11 | SAMN05560575 | OH, USA      | Urogenital | <i>N. meningitidis</i> | 11                  |
| M07149        | SAMN04883361 | Saudi Arabia | Meningitis | <i>N. meningitidis</i> | 11                  |
| M07161        | SAMN04883364 | Mali         | Meningitis | <i>N. meningitidis</i> | 11                  |
| M07162        | SAMN04883365 | Mali         | Meningitis | <i>N. meningitidis</i> | 11                  |
| M07165        | SAMN04883366 | Gambia       | Meningitis | <i>N. meningitidis</i> | 11                  |
| M07999        | SAMN04883367 | Burkina Faso | Meningitis | <i>N. meningitidis</i> | 11                  |
| M08000        | SAMN04883368 | Burkina Faso | Meningitis | <i>N. meningitidis</i> | 11                  |
| M08001        | SAMN04883369 | Burkina Faso | Meningitis | <i>N. meningitidis</i> | 11                  |
| M09261        | SAMN04883370 | Burkina Faso | Meningitis | <i>N. meningitidis</i> | 11                  |
| M09293        | SAMN04883371 | Burkina Faso | Meningitis | <i>N. meningitidis</i> | 11                  |
| M12752        | SAMN04883372 | Mali         | Meningitis | <i>N. meningitidis</i> | 11                  |
| M22160        | SAMN04883373 | Mali         | Meningitis | <i>N. meningitidis</i> | 11                  |
| M22189        | SAMN04883374 | Mali         | Meningitis | <i>N. meningitidis</i> | 11                  |
| M22191        | SAMN04883375 | Mali         | Meningitis | <i>N. meningitidis</i> | 11                  |
| M22718        | SAMN04883376 | Mauritius    | Meningitis | <i>N. meningitidis</i> | 11                  |
| M22722        | SAMN04883377 | Algeria      | Meningitis | <i>N. meningitidis</i> | 11                  |
| M22740        | SAMN04883378 | Cameroon     | Meningitis | <i>N. meningitidis</i> | 11                  |
| M22745        | SAMN04883379 | Burkina Faso | Meningitis | <i>N. meningitidis</i> | 11                  |

|                    |              |                          |             |                         |       |
|--------------------|--------------|--------------------------|-------------|-------------------------|-------|
| <b>M22747</b>      | SAMN04883380 | Central African Republic | Meningitis  | <i>N. meningitidis</i>  | 11    |
| <b>M22748</b>      | SAMN04883381 | Central African Republic | Meningitis  | <i>N. meningitidis</i>  | 11    |
| <b>M22759</b>      | SAMN04883382 | Niger                    | Meningitis  | <i>N. meningitidis</i>  | 11    |
| <b>M22769</b>      | SAMN04883384 | Niger                    | Meningitis  | <i>N. meningitidis</i>  | 11    |
| <b>M22772</b>      | SAMN04883385 | Senegal                  | Meningitis  | <i>N. meningitidis</i>  | 11    |
| <b>M22797</b>      | SAMN04883388 | Burkina Faso             | Meningitis  | <i>N. meningitidis</i>  | 11    |
| <b>M22801</b>      | SAMN04883389 | Djibouti                 | Meningitis  | <i>N. meningitidis</i>  | 11    |
| <b>M22809</b>      | SAMN04883391 | Benin                    | Meningitis  | <i>N. meningitidis</i>  | 2881  |
| <b>M22819</b>      | SAMN04883393 | Benin                    | Meningitis  | <i>N. meningitidis</i>  | 2881  |
| <b>M22822</b>      | SAMN04883394 | Togo                     | Meningitis  | <i>N. meningitidis</i>  | 2881  |
| <b>M22828</b>      | SAMN04883395 | Burkina Faso             | Meningitis  | <i>N. meningitidis</i>  | 2881  |
| <b>M23413</b>      | SAMN04883396 | Burkina Faso             | Meningitis  | <i>N. meningitidis</i>  | 11    |
| <b>M24705</b>      | SAMN04883402 | Burkina Faso             | Meningitis  | <i>N. meningitidis</i>  | 8638  |
| <b>M24730</b>      | SAMN04883405 | Burkina Faso             | Meningitis  | <i>N. meningitidis</i>  | 11    |
| <b>M25070</b>      | SAMN04883408 | Mali                     | Meningitis  | <i>N. meningitidis</i>  | 11    |
| <b>M25073</b>      | SAMN04883410 | Mali                     | Meningitis  | <i>N. meningitidis</i>  | 11    |
| <b>M25074</b>      | SAMN04883411 | Mali                     | Meningitis  | <i>N. meningitidis</i>  | 11    |
| <b>M25087</b>      | SAMN04883421 | Mali                     | Meningitis  | <i>N. meningitidis</i>  | 11    |
| <b>M25419</b>      | SAMN04883430 | South Africa             | Meningitis  | <i>N. meningitidis</i>  | 11    |
| <b>M25438</b>      | SAMN04883437 | Burkina Faso             | Meningitis  | <i>N. meningitidis</i>  | 11    |
| <b>M25456</b>      | SAMN04883439 | Burkina Faso             | Meningitis  | <i>N. meningitidis</i>  | 11    |
| <b>M25459</b>      | SAMN04883440 | Burkina Faso             | Meningitis  | <i>N. meningitidis</i>  | 11    |
| <b>M25462</b>      | SAMN04883441 | Burkina Faso             | Meningitis  | <i>N. meningitidis</i>  | 11    |
| <b>M25472</b>      | SAMN04883448 | Burkina Faso             | Meningitis  | <i>N. meningitidis</i>  | 11    |
| <b>M25474</b>      | SAMN04883450 | Burkina Faso             | Meningitis  | <i>N. meningitidis</i>  | 11    |
| <b>M25476</b>      | SAMN04883451 | Burkina Faso             | Meningitis  | <i>N. meningitidis</i>  | 11    |
| <b>M26263</b>      | SAMN07615715 | USA                      | Meningitis  | <i>N. meningitidis</i>  | 11    |
| <b>M26417</b>      | SAMN07615714 | USA                      | Meningitis  | <i>N. meningitidis</i>  | 11    |
| <b>M26503</b>      | SAMN07615713 | USA                      | Meningitis  | <i>N. meningitidis</i>  | 11    |
| <b>M27559</b>      | SAMN04883452 | Burkina Faso             | Meningitis  | <i>N. meningitidis</i>  | 11    |
| <b>NG_1</b>        |              | St. Louis, MO, USA       | Urogenital  | <i>N. gonorrhoeae</i>   |       |
| <b>NG_2</b>        |              | St. Louis, MO, USA       | Urogenital  | <i>N. gonorrhoeae</i>   |       |
| <b>NG_3</b>        |              | St. Louis, MO, USA       | Urogenital  | <i>N. gonorrhoeae</i>   |       |
| <b>NG_4</b>        |              | St. Louis, MO, USA       | Urogenital  | <i>N. gonorrhoeae</i>   |       |
| <b>NG_5</b>        |              | St. Louis, MO, USA       | Urogenital  | <i>N. gonorrhoeae</i>   |       |
| <b>NG_ref_1090</b> |              |                          |             |                         |       |
| <b>NG_ref_USO</b>  |              |                          |             |                         |       |
| <b>NG_ref_WHO</b>  |              |                          |             |                         |       |
| <b>NM_10</b>       |              | St. Louis, MO, USA       | Urogenital  | <i>N. meningitidis</i>  | 11    |
| <b>NM_11</b>       |              | St. Louis, MO, USA       | Respiratory | <i>N. meningitidis</i>  |       |
| <b>NM_12</b>       |              | St. Louis, MO, USA       | Respiratory | <i>N. polysaccharea</i> |       |
| <b>NM_13</b>       |              | St. Louis, MO, USA       | Respiratory | <i>N. meningitidis</i>  | 11    |
| <b>NM_14</b>       |              | St. Louis, MO, USA       | Respiratory | <i>N. meningitidis</i>  | 41/44 |
| <b>NM_15</b>       |              | St. Louis, MO, USA       | Urogenital  | <i>N. meningitidis</i>  | 4821  |
| <b>NM_2</b>        |              | St. Louis, MO, USA       | Urogenital  | <i>N. meningitidis</i>  | 11    |
| <b>NM_3</b>        |              | St. Louis, MO, USA       | Urogenital  | <i>N. meningitidis</i>  |       |

|                 |              |                    |            |                        |    |
|-----------------|--------------|--------------------|------------|------------------------|----|
| <b>NM_4</b>     |              | St. Louis, MO, USA | Urogenital | <i>N. meningitidis</i> | 11 |
| <b>NM_5</b>     |              | St. Louis, MO, USA | Urogenital | <i>N. meningitidis</i> | 11 |
| <b>NM_6</b>     |              | St. Louis, MO, USA | Urogenital | <i>N. meningitidis</i> | 11 |
| <b>NM_7</b>     |              | St. Louis, MO, USA | Urogenital | <i>N. meningitidis</i> | 11 |
| <b>NM_8</b>     |              | St. Louis, MO, USA | Urogenital | <i>N. meningitidis</i> | 11 |
| <b>NM_8013</b>  |              |                    |            |                        |    |
| <b>NM_9</b>     |              | St. Louis, MO, USA | Urogenital | <i>N. meningitidis</i> |    |
| <b>NM_FAM18</b> |              |                    |            |                        |    |
| <b>NM_IN_1</b>  | LXLA00000000 | Indiana, USA       | Urogenital | <i>N. meningitidis</i> | 11 |
| <b>NM_IN_2</b>  | LXLB00000000 | Indiana, USA       | Urogenital | <i>N. meningitidis</i> | 11 |
| <b>NM_MC58</b>  | AE002098     |                    | Meningitis | <i>N. meningitidis</i> |    |

**Table S2. Nm and Ng genomic identified resistance point mutations**

| <b>Isolate</b> | <b>Mutations</b>                                                                                    |
|----------------|-----------------------------------------------------------------------------------------------------|
| NM02           | mosaic penA p.N512Y                                                                                 |
| NM03           | mosaic penA p.N512Y                                                                                 |
| NM04           | mosaic penA p.N512Y                                                                                 |
| NM05           | mosaic penA p.N512Y                                                                                 |
| NM06           | mosaic penA p.N512Y                                                                                 |
| NM07           | mosaic penA p.N512Y                                                                                 |
| NM08           | mosaic penA p.N512Y                                                                                 |
| NM09           | porB p.A121D, mosaic penA p.N512Y                                                                   |
| NM10           | mosaic penA p.N512Y                                                                                 |
| NM11           | porB p.A121D, mosaic penA p.N512Y                                                                   |
| NM12           | mosaic penA p.N512Y, mosaic penA p.I312M, mosaic penA p.V316T, penA p.P551L, mtr120 promotor n.-120 |
| NM13           | NA                                                                                                  |
| NM14           | NA                                                                                                  |
| NM15           | mosaic penA p.N512Y                                                                                 |
| NG01           | NA                                                                                                  |
| NG02           | gyrA p.S91F, rpsJ p.V57M, mtrR p.G45D                                                               |
| NG03           | rpsJ p.V57M, penA p.P551L                                                                           |
| NG04           | porB p.g120K, rpsJ p.V57M                                                                           |
| NG05           | gyrA p.S91F, rpsJ p.V57M                                                                            |
